# Supplementary material for: Eye Movement Desensitization and Reprocessing versus Cognitive Behavior Therapy for Treating Post-Traumatic Stress Disorder: A Systematic Review and Meta-Analysis
Source: MDPI journal article supplement (doi:10.3390/ijerph192416836), 2022-12-15

### Table S1: Critical Appraisal for RCTs

| Authors/Year of Publication | Random sequence generation adequate? | Allocation concealment adequate? | Blinding of participants adequate? | Blinding of personnel adequate? | Blinding of outcome assessors adequate? | Was incomplete outcome data addressed? | Was it free of selective reporting? |
|-----------------------------|--------------------------------------|----------------------------------|------------------------------------|---------------------------------|-----------------------------------------|----------------------------------------|-------------------------------------|
| de Roos et al. (2011)       | -                                    | ?                                | -                                  | ?                               | +                                       | +                                      | +                                   |
| Nijdam et al. (2012)        | +                                    | +                                | -                                  | ?                               | +                                       | +                                      | +                                   |
| Diehle et al. (2015)        | +                                    | +                                | -                                  | -                               | +                                       | +                                      | +                                   |
| van den Berg et al. (2015)  | +                                    | ?                                | -                                  | +                               | +                                       | +                                      | +                                   |
| De Bont et al. (2016)       | ?                                    | -                                | -                                  | +                               | +                                       | +                                      | +                                   |
| de Roos et al. (2017)       | +                                    | +                                | -                                  | +                               | +                                       | +                                      | +                                   |
| Nijdam et al. (2018)        | +                                    | -                                | -                                  | -                               | +                                       | +                                      | +                                   |
| Stanbury et al (2020)       | +                                    | +                                | -                                  | +                               | +                                       | +                                      | +                                   |

|          |                         |          |                             |          |                          |
|----------|-------------------------|----------|-----------------------------|----------|--------------------------|
| <b>+</b> | <b>Low Risk of bias</b> | <b>?</b> | <b>Unclear Risk of bias</b> | <b>-</b> | <b>High Risk of bias</b> |
|----------|-------------------------|----------|-----------------------------|----------|--------------------------|

**Figure S1: Meta-analysis of the effects of post-treatment on PTSD symptoms**

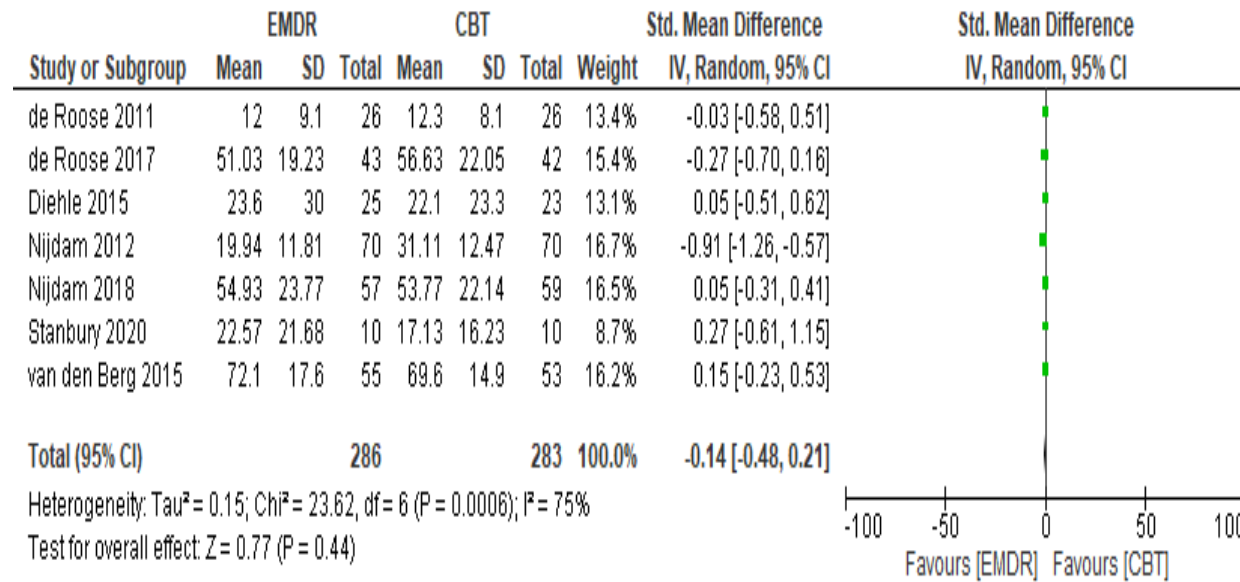

**Figure S2: Meta-analysis of the effects of three-month follow-up on PTSD symptoms**

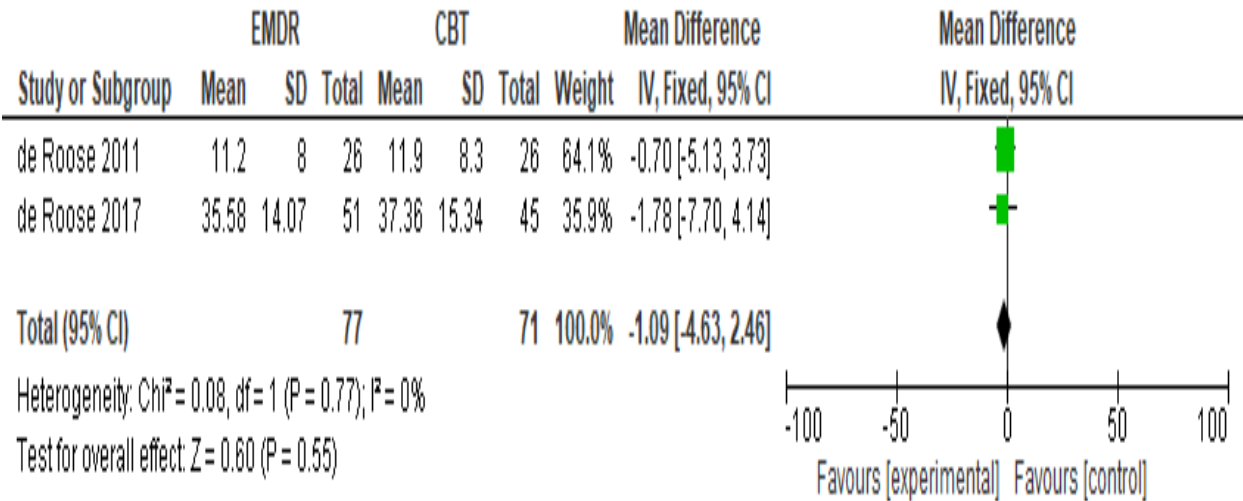

**Figure S3: Meta-analysis of the effects of post-treatment on depression symptoms**

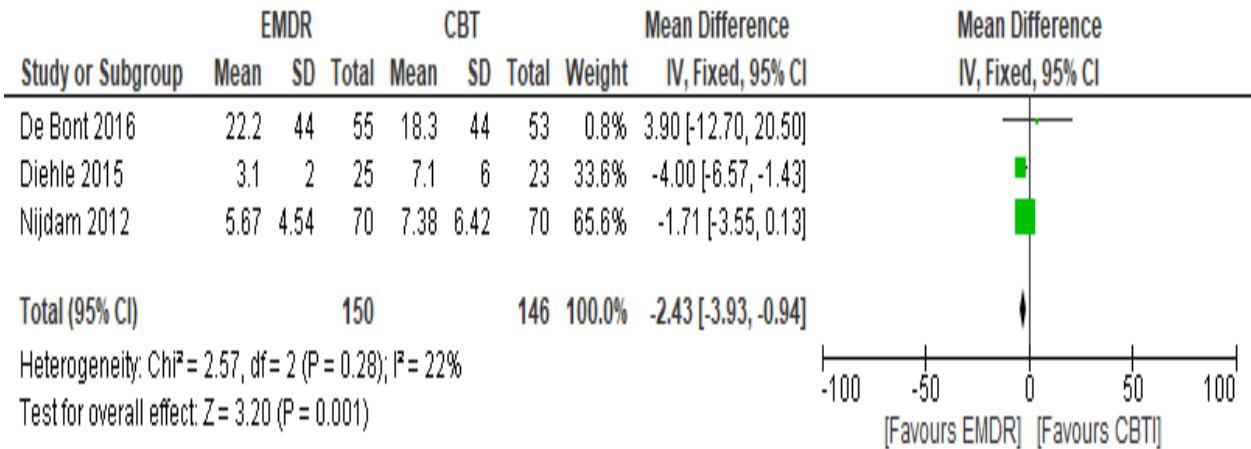

**Figure S4: Meta-analysis of the effects of six-month follow-up on depression symptoms**

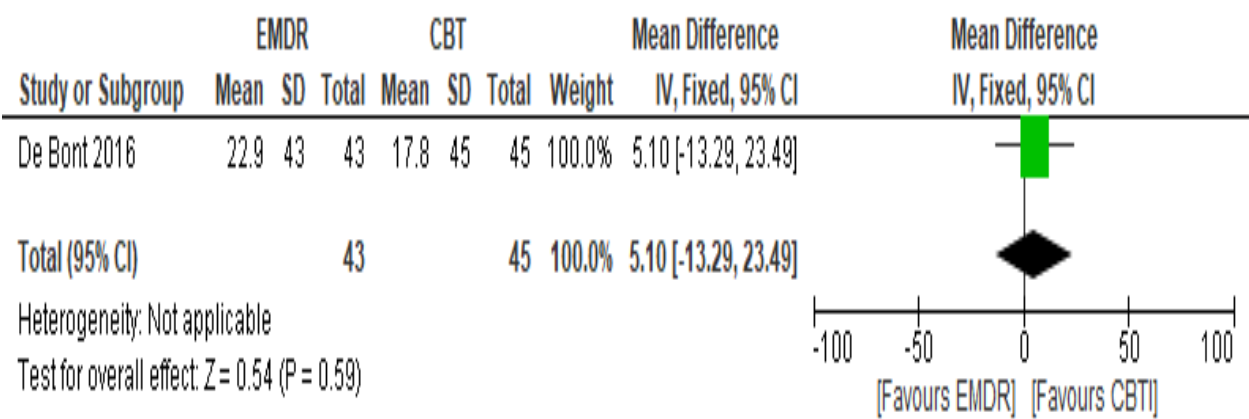

**Figure S5: Meta-analysis of the effects of post-treatment on anxiety symptoms**

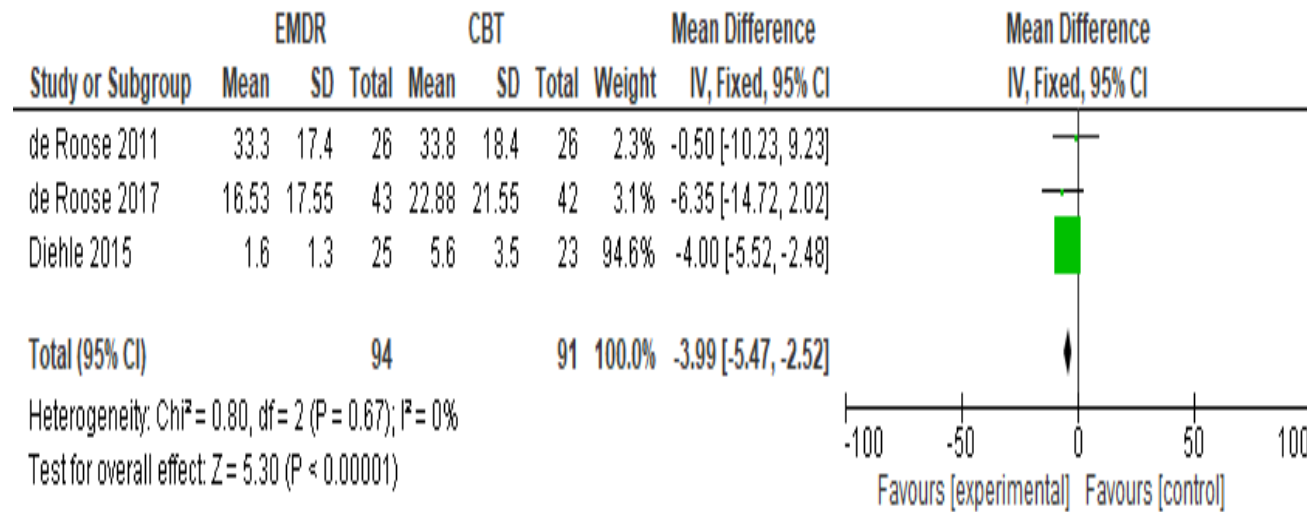

**Figure S6: Meta-analysis of the effects of three-month follow-up on anxiety symptoms**

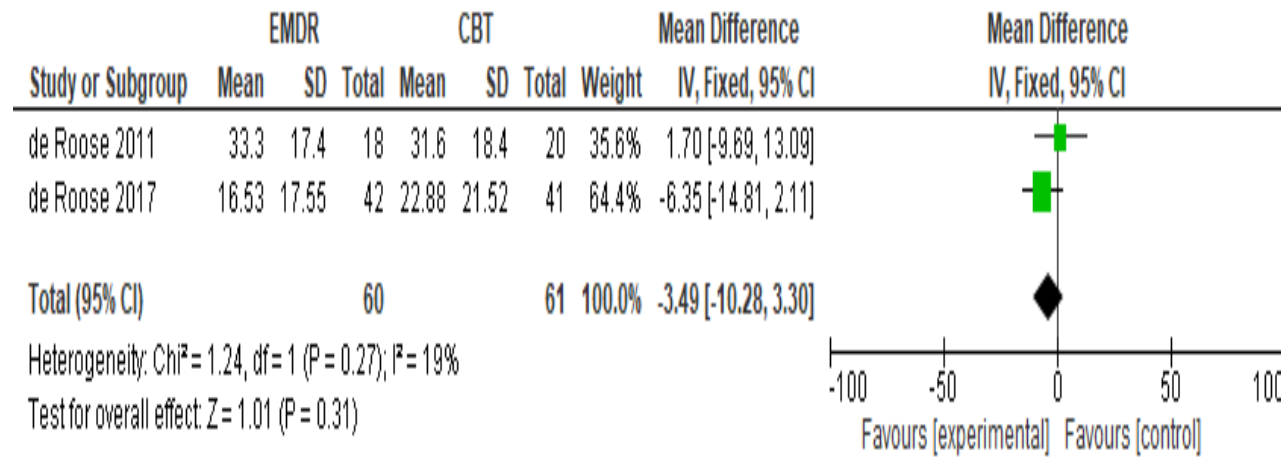

Supplement: s1 [file s1]
